# Supplementary material for: A review study of fetal circulatory models to develop a digital twin of a fetus in a perinatal life support system
Source: PubMed Central journal article supplement (PMC9532745; doi:10.3389/fped.2022.915846), 2022-09-21
Supplement: Table_1.pdf [file Table_1.pdf]

## Supplementary Material

Table S1: Overview of the 0D models. Using background color, the papers are grouped based on Section 2.4. LPM: lumped parameter model, OFM: one fiber model, PP: prescribed pressure or flow profile, TVEM: time varying elastance model.

| Reference                                | Cardiovascular system | Closed loop | Pulsatile | Wave reflections | Maternal-fetal gas exchange | Fetal growth      | Baro- and chemoreceptor reflex |
|------------------------------------------|-----------------------|-------------|-----------|------------------|-----------------------------|-------------------|--------------------------------|
| Huikeshoven et al. (1980)                | 6 compartments        | yes         | yes       | LPM              | no                          | no; 3kg           | no                             |
| Huikeshoven et al. (1985a)               | 16 compartments       | yes         | yes       | LPM              | yes                         | no; 3kg           | no                             |
| Huikeshoven et al. (1985b)               | 16 compartments       | yes         | yes       | LPM              | yes                         | no; 3kg           | no                             |
| Pennati et al. (1997)                    | 23 compartments       | yes         | TVEM      | LPM              | no                          | no; 3kg           | no                             |
| Pennati and Fumero (2000)                | 23 compartments       | yes         | TVEM      | LPM              | no                          | yes; 20-40w       | no                             |
| Yigit et al. (2015)                      | 30 compartments       | yes         | TVEM      | LPM              | yes                         | no; 40w and 3.5kg | no                             |
| Yigit et al. (2019)                      | 16 compartments       | yes         | TVEM      | LPM              | yes                         | yes; 20-40w       | no                             |
| Munneke et al. (2021)                    | 12 compartments       | yes         | OFM       | LPM              | yes                         | no; 40w and 3.5kg | no                             |
| Sá Couto et al. (2010)                   | 11 compartments       | yes         | TVEM      | LPM              | no                          | no; 3kg           | no                             |
| Van der Hout-van der Jagt et al. (2012)  | 9 compartments        | yes         | OFM       | LPM              | yes                         | no; 40w and 3.5kg | yes                            |
| Van der Hout-van der Jagt et al. (2013a) | 9 compartments        | yes         | OFM       | LPM              | yes                         | no; 40w and 3.5kg | yes                            |
| Van der Hout-van der Jagt et al. (2013b) | 10 compartments       | yes         | OFM       | LPM              | yes                         | no; 40w and 3.5kg | yes                            |
| Bullens et al. (2014)                    | 9 compartments        | yes         | OFM       | LPM              | yes                         | no; 40w and 3.5kg | yes                            |
| Wang et al. (2015)                       | 9 compartments        | yes         | OFM       | LPM              | yes                         | no; 40w and 3.5kg | yes                            |
| Jongen et al. (2016a)                    | 11 compartments       | yes         | no        | LPM              | yes                         | no; 40w and 3.5kg | yes                            |
| Jongen et al. (2016b)                    | 11 compartments       | yes         | no        | LPM              | yes                         | no; 40w and 3.5kg | yes                            |
| Luria et al. (2014)                      | 18 compartments       | yes         | TVEM      | LPM              | no                          | yes; 21-40w       | no                             |
| Garcia-Canadilla et al. (2014)           | 14 vessels            | no          | PP        | LPM              | no                          | yes; 31-34w       | no                             |
| Garcia-Canadilla et al. (2015)           | 19 vessels            | no          | PP        | LPM              | no                          | yes; 28-40w       | no                             |

Continued on next page

Table S1: Overview of the 0D models. Using background color, the papers are grouped based on Section 2.4. LPM: lumped parameter model, OFM: one fiber model, PP: prescribed pressure or flow profile, TVEM: time varying elastance model. (Continued)

|                               |                   |     |      |     |    |             |    |
|-------------------------------|-------------------|-----|------|-----|----|-------------|----|
| Kulkarni et al. (2018)        | 20 vessels        | no  | PP   | LPM | no | yes; 19-35w | no |
| Reuwer et al. (1986)          | 1 vessel          | no  | PP   | LPM | no | yes; 16-40w | no |
| Thompson and Stevens (1989)   | Different numbers | no  | PP   | LPM | no | no          | no |
| Thompson and Trudinger (1990) | Different numbers | no  | PP   | LPM | no | no          | no |
| Todros et al. (1992)          | Different numbers | no  | PP   | TLM | no | yes         | no |
| Guiot et al. (1992)           | Different numbers | no  | PP   | LPM | no | no          | no |
| Talbert (1995)                | 7 compartments    | no  | PP   | LPM | no | no          | no |
| Grigioni et al. (2001)        | 8 compartments    | yes | TVEM | LPM | no | no; 3.45kg  | no |
| Mo et al. (1988)              | 1 vessel          | no  | PP   | TLM | no | yes; 20-25w | no |
| Adamson et al. (1989)         | 1 vessel          | no  | PP   | TLM | no | no; 20w     | no |
| Myers and Capper (2000)       | 9 compartments    | yes | PP   | TLM | no | no; 28w     | no |
| Capper et al. (2002)          | 8 compartments    | yes | PP   | TLM | no | yes; 28-40w | no |
| Hill et al. (1995)            | 1 vessel          | no  | PP   | TLM | no | no; 18w     | no |
| Pennati et al. (2003)         | 4 compartments    | no  | no   | LPM | no | yes; 20-38w | no |

Table S2: Overview of the 1D models. Using background color, the papers are grouped based on Section 2.5. LPM: lumped parameter model, OFM: one fiber model, PP: prescribed pressure or flow profile, TVEM: time varying elastance model.

| Reference                       | Cardiovascular system | Closed loop | Pulsatile   | Wave reflections | Maternal-fetal gas exchange | Fetal growth         | Baro- and chemoreceptor reflex |
|---------------------------------|-----------------------|-------------|-------------|------------------|-----------------------------|----------------------|--------------------------------|
| Guettouche et al. (1992)        | 16 segments           | no          | PP          | 1D               | no                          | no; 27.5w and 1.25kg | no                             |
| Guettouche et al. (1993)        | 16 segments           | no          | PP          | 1D               | no                          | no; 27.5w and 1.25kg | no                             |
| Ménigault et al. (1998)         | 7 vessels             | no          | TVEM and PP | 1D               | no                          | no; 40w              | no                             |
| Sengupta et al. (1997)          | 1 vessel              | no          | PP          | 1D               | no                          | yes; 3-20w           | no                             |
| Kleiner-Assaf et al. (1999)     | 1 vessel              | no          | PP          | 1D               | no                          | no                   | no                             |
| Hellevik et al. (2000)          | 2 vessels             | no          | PP          | 1D               | no                          | no; 20-25w           | no                             |
| Van den Wijngaard et al. (2006) | 13 segments           | no          | PP          | 1D               | no                          | yes; 15-40w          | no                             |
| Sled et al. (2019)              | 1 vessel              | no          | PP          | 1D               | no                          | no                   | no                             |
| Mynard (2011)                   | 186 vessels           | yes         | TVEM        | 1D               | no                          | no; 40w              | no                             |
| Zhang et al. (2021)             | 135 vessels           | yes         | TVEM        | 1D               | no                          | no; 40w              | no                             |
